# Supplementary material
Source: publisher site journal article supplement (https://www.dovepress.com/article/360000)

**Figure S1. The high-resolution of C 1s (A), N 1s (B) and Se 3d (C) peaks of the XPS spectra of Se/CDs, respectively.**


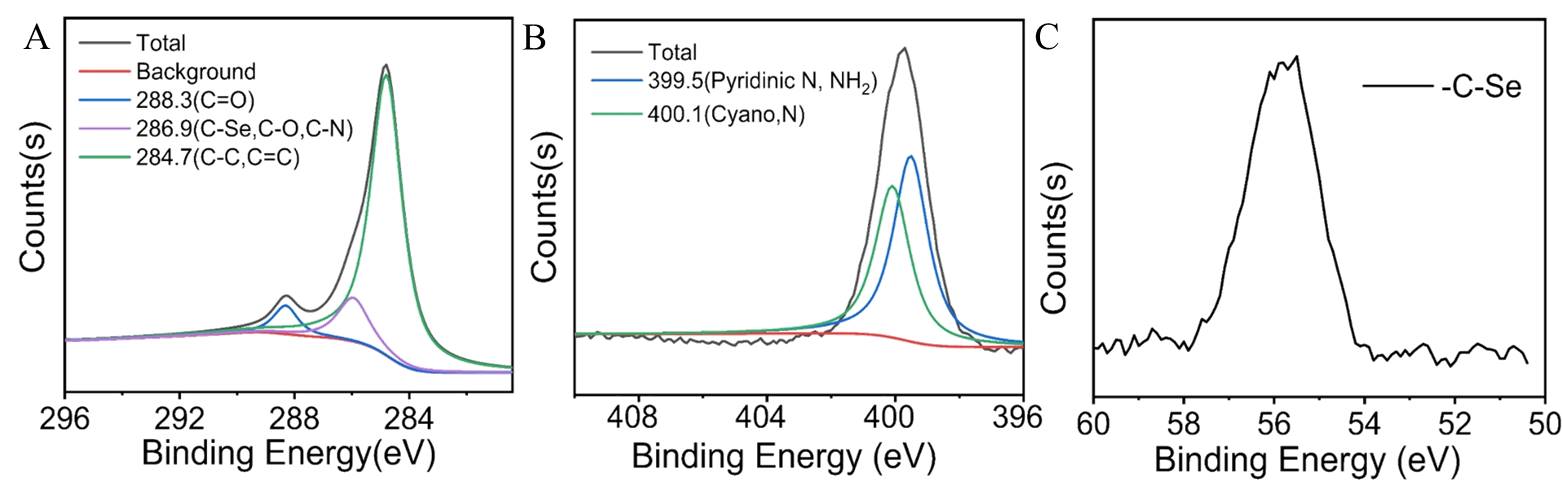


**Figure S2. The effect of Se/CDs supplementation on the proliferation activity of cumulus cells and** **oocyte fragmentation rate**

**A: Proliferation activity assay of cumulus cells**

Note: NC represents the negative control group. LD, MD and HD represent the Se/CDs groups supplemented with 50, 100 and 200 μg/mL of Se/CDs, respectively. The different lowercase letters in each column indicates significant differences between different groups (p<0.05).

**B: Oocyte fragmentation rate**

Note: NC represents the negative control group. LD, MD and HD represent the Se/CDs groups supplemented with 50, 100 and 200 μg/mL of Se/CDs, respectively. The different lowercase letters in each column indicates significant differences between different groups (p<0.05).


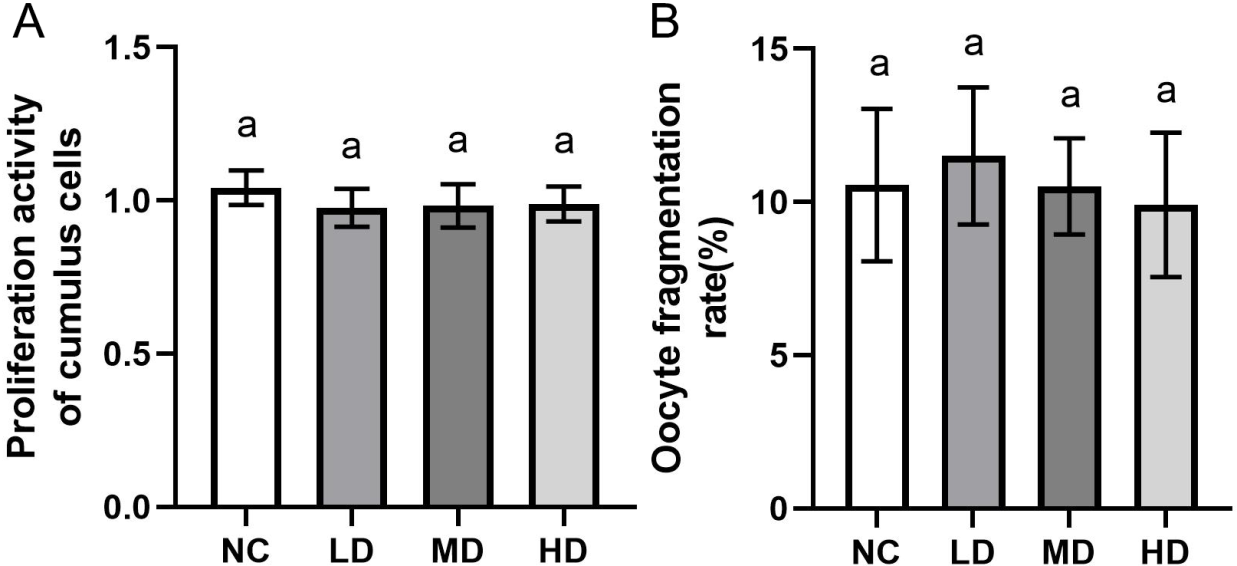

Supplement: Supplementary file 1 [file get_supplementary_file.php]
